# Using local convolutional neural networks for genomic prediction

Torsten Pook<sup>1,\*</sup>, Jan Freudenthal<sup>2</sup>, Arthur Korte<sup>2</sup> and Henner Simianer<sup>1</sup>

<sup>1</sup> *Animal Breeding and Genetics Group, Department of Animal Sciences, Center for Integrated Breeding Research, University of Goettingen, Goettingen, Germany*

<sup>2</sup> *Center for Computational and Theoretical Biology, University of Wuerzburg, Wuerzburg, Germany*

Correspondence\*:

Torsten Pook, Animal Breeding and Genetics Group, Department of Animal Sciences, Center for Integrated Breeding Research, University of Goettingen, Albrecht-Thaer-Weg 3, 37075 Goettingen, Germany  
torsten.pook@uni-goettingen.de

## 2 ABSTRACT

3 The prediction of breeding values and phenotypes is of central importance for both livestock  
4 and crop breeding. With increasing computational power and more and more data to potentially  
5 utilize, Machine Learning and especially Deep Learning have risen in popularity over the last few  
6 years. In this study, we are proposing the use of local convolutional neural networks for genomic  
7 prediction, as a region specific filter corresponds much better with our prior genetic knowledge  
8 of traits than traditional convolutional neural networks. Model performances are evaluated on a  
9 simulated maize data panel ( $n = 10,000$ ) and real Arabidopsis data ( $n = 2,039$ ) for a variety of  
10 traits with the local convolutional neural network outperforming both multi layer perceptrons and  
11 convolutional neural networks for basically all considered traits. Linear models like the genomic  
12 best linear unbiased prediction that are often used for genomic prediction are outperformed by  
13 up to 24%. Highest gains in predictive ability was obtained in cases of medium trait complexity  
14 with high heritability and large training populations. However, for small dataset with 100 or 250  
15 individuals for the training of the models, the local convolutional neural network is performing  
16 slightly worse than the linear models. Nonetheless, this is still 15% better than a traditional  
17 convolutional neural network, indicating a better performance and robustness of our proposed  
18 model architecture for small training populations. In addition to the baseline model, various other  
19 architectures with different windows size and stride in the local convolutional layer, as well as  
20 different number of nodes in subsequent fully connected layers are compared against each other.  
21 Finally, the usefulness of Deep Learning and in particular local convolutional neural networks  
22 in practice is critically discussed, in regard to multi dimensional inputs and outputs, computing  
23 times and other potential hazards.

24 **Keywords:** genomic prediction, deep learning, machine learning, local convolutional neural network, Keras, phenotype prediction,  
25 prediction

## 1 INTRODUCTION

26 The prediction of breeding values and phenotypes is of central importance for both livestock and crop  
27 breeding. Obtaining accurate estimates of breeding values at an earlier time point can impact the decision

28 on which individuals and lines to keep in a breeding programs, reducing the generation cycle and therefore  
29 leading to higher genomic gains per year (Schaeffer, 2006). Optimizing breeding schemes is of key  
30 importance for overcoming the global challenges of feeding a planet with a rising Human population (Foley  
31 et al., 2011).

32 The most commonly applied method for the prediction of breeding values and phenotypes consider a mixed  
33 model or bayesian linear models (Meuwissen et al., 2001; Gianola et al., 2009; Erbe et al., 2012). With the  
34 availability of genomic data, traditional methods that rely on parental relationships and pedigrees have been  
35 replaced by genomic evaluations in which the pedigree-based relationship matrix has been replaced by a  
36 variant constructed from genomic data (VanRaden, 2008). Currently, variations of this approach have been  
37 successfully implemented in both animal (Hayes et al., 2009; Hayes and Goddard, 2010; Gianola and Rosa,  
38 2015) and plant breeding (Jannink et al., 2010; Albrecht et al., 2011; Nakaya and Isobe, 2012; Heslot et al.,  
39 2015). As breeding values are additive by design, most of these models only account for additive single  
40 marker effects, but adaptations to account for dominance and epistatic interactions have been proposed (Da  
41 et al., 2014; Jiang and Reif, 2015; Martini, 2017) and are regularly applied for the prediction of phenotypes.  
42 In recent years the use of deep learning (DL) and in particular artificial neural networks (ANN) have become  
43 more and more popular in a variety of fields in genetics (Eraslan et al., 2019). This is further enhanced by  
44 a variety of available open-source libraries like Keras (Chollet, 2015) and Tensorflow (Abadi et al., 2016)  
45 which combine options for a simple and flexible set up of ANNs with a highly efficient computational back  
46 end.

47 The transition from traditional mixed models and bayesian linear models to the use of DL for genomic  
48 prediction seems like a natural next step, as reflected by a variety of recent studies (Bellot et al., 2018;  
49 Waldmann, 2018; Ma et al., 2018; Montesinos-López et al., 2019; Pérez-Enciso and Zingaretti, 2019;  
50 Azodi et al., 2019; Khaki and Wang, 2019) reporting performance of multi-layer perceptrons (MLP) and  
51 convolutional neural networks (CNN) for a variety of traits in both humans and a wide set of livestock and  
52 crop species. The common result in those studies is that traditionally applied statistical methods such as  
53 genomic best linear unbiased prediction (GBLUP) or methods from the bayesian alphabet (Meuwissen  
54 et al., 2001; Gianola et al., 2009; Erbe et al., 2012) lead to similar or slightly higher predictive ability.  
55 In cases for which improvements were achieved, either very specific trait architectures are considered  
56 (Waldmann, 2018), improvements are not consistent across traits (Bellot et al., 2018; Montesinos-López  
57 et al., 2019) or additional data like environmental information is used (Khaki and Wang, 2019). For most  
58 traits considered in those studies, the best performing ANNs are usually MLPs with one or sometimes two  
59 fully-connected layers (FCL) between input and output layer (Bellot et al., 2018; Montesinos-López et al.,  
60 2019). Predictive ability obtained with CNNs is usually similar or even slightly worse (Bellot et al., 2018)  
61 with best performing models using very small filters. On first glance, this might be surprising since in other  
62 fields one of the biggest reasons for the rise of ANNs is attributed to the use of CNNs and convolutional  
63 layers (CL) (Krizhevsky et al., 2012; Goodfellow et al., 2016; Ubbens and Stavness, 2017). One must  
64 consider here that SNP arrays only contain markers and no full genome sequence. Therefore, a specific  
65 sequence of alleles on a SNP-chip in one region can not be linked to the same sequence of alleles in  
66 another region. As traditional CLs are directly assuming this, naive use of a CL does not make much sense  
67 from a modelling perspective. Therefore, we here propose the use of local convolutional layers (LCL)  
68 to allow for the use of region specific filters while still maintaining the positive features of a CL like the  
69 massively reduced number of parameters in the model. Region specific filter means that in contrast to a CL,  
70 parameters of the layers can vary based on the region, e.g. for a toy example given in Figure 1 *a, d, g* can be  
71 different whereas a CNN architecture would result in  $a = d = g$ . In the following, the performance of local

convolutional neural networks (LCNN) is compared to both traditional methods for genomic prediction and other more commonly applied ANN architectures.

## 2 MATERIAL AND METHODS

### 2.1 Material

As a first dataset, a simulated data panel containing 10,000 maize lines that were genotyped at 34,595 SNPs with 17 traits of different trait complexities ranging from traits with 10 additive single locus QTL to traits caused by epistatic interaction between potentially physically linked QTL was considered. Individual effect sizes were drawn from a gaussian, gamma and binomial distribution. The dataset was generated based on simulations in the R-package MoBPS (Pook et al., 2020) and original genotypes stem from 501 doubled haploid lines of the European maize landrace Kemater Landmais Gelb that were genotyped via the Affymetrix Axiom Maize Genotyping Array (Unterseer et al., 2014) and reduced via LD pruning in PLINK (Purcell et al., 2007). The interested reader is referred to Hölker et al. (2019) for details on the data generation procedure. The R-code used to generate the 10,000 individuals and the 17 traits in MoBPS is available in Supplementary File S1. For each trait, residuals variances were varied to obtain traits with a heritability  $h^2$  of 0.1, 0.5, 0.8 and 1.

As a second dataset, a real data panel from the 1001 genomes project of *Arabidopsis thaliana* (Alonso-Blanco et al., 2016) was considered. After quality control, filtering for minor allele frequency and LD pruning, we reduced the available 10.7 M SNPs to 180k SNPs for 2,029 lines. Tests were conducted for 50 different traits that were available and contained measurements for between 83 and 468 lines (Atwell et al., 2010; Li et al., 2010; Meijón et al., 2014; Strauch et al., 2015; Seren et al., 2016). The interested reader is referred to Freudenthal (2020) for details on the data preparation steps.

Scripts used to perform the model fitting in Keras (Chollet, 2015) are available in Supplementary File S2 and S3. The R-packages rrBLUP (Endelman, 2011) and BGLR (Pérez and de los Campos, 2014) were used for fitting of the linear models.

### 2.2 Design of the neural network

For all tested ANNs, the SNP dataset with genotypes coded as 0,1,2 was used as the input layer and (centered) phenotypes were used as the output layer. In genomic prediction and in particular when using an ANN, the number of parameters is substantially higher than the number of individuals that can be used for the model fitting. Thus, leading to  $n \ll p$  problems (Fan et al., 2014). In this study, we will compare four main classes of models:

1. Linear models (LM)
2. Multi-layer perceptrons (MLP)
3. Convolutional neural networks (CNN)
4. Local convolutional neural networks (LCNN)

For the class of LMs a variety of models have been proposed. The most frequently applied linear model in today's applications is the genomic best linear unbiased predictor (GBLUP, (Meuwissen et al., 2001)) that is using a mixed model in which the variance of the random effect is given by a relationship matrix like the one proposed by VanRaden (2008). An alternative to this are methods typically referred to as the bayesian alphabet (Gianola et al., 2009; de los Campos et al., 2013) that perform bayesian linear regression with prior assumptions on the individual marker variance, e.g. BayesA is using a scaled-t-distribution as the prior. In particular for phenotype prediction, there are a variety of other genomic relationship matrices for the mixed model have been proposed to account for non-additive effects. The extended genomic best

113 linear unbiased predictor (EGBLUP, (Martini, 2017)) is designed to assign linear effects to specific marker  
114 combination and therefore is able to include epistatic interactions into the mixed model.

115 All three other classes describe different types of ANNs. Here, we define the class of MLP as ANNs that  
116 only contain FCLs. In CNN / LCNN we are using an additional single CL / LCL in front of the FCLs  
117 without any use of pooling. For all three ANN classes we tested different layer designs ranging from just  
118 one up to three FCLs with varying number of nodes. For the CNN and LCNN we also tested different  
119 filters for the convolutional layer ranging from windows size and strides between 3 and 40 with potential  
120 overlap between windows. For all models the relu function was used as the activation function with an  
121 adam optimizer (Kingma and Ba, 2014) to minimize the mean squared errors with a dropout rate of 0.3  
122 after each layer (Chollet, 2015; Goodfellow et al., 2016). Changes to activation function, optimizer, dropout  
123 rate and target function were also tested but only had neglectable effects and are therefore are neglected in  
124 the following.

125 Models are compared based on their predictive ability on the test set (80% of the samples used for model  
126 fitting, 20% as a test set), and we define the predictive ability as the correlation of the predicted genomic  
127 values and their phenotypes.

### 128 **2.3 Size and structure of the training data**

129 A well-known problem of ANNs is that overfitting can occur after a high number of training epochs  
130 (Goodfellow et al., 2016). Therefore, we split the 8,000 samples used for model fitting for the simulated  
131 maize data into 7,000 samples used for the actual training of the model (training set) and 1,000 samples  
132 that are just used to determine at what state training should be stopped (validation set). After each epoch  
133 the predictive ability of the model was derived based on the validation set and the best performing model  
134 from up to 50 epochs was used as the final model. In the same way the validation set can also be used to  
135 derive the ideal architecture of the ANN.

136 To further investigate the impact of the size of the training population, we considered different sizes of the  
137 training data (100, 250, 500, 1,000, 2,000, 3,000, 4,000, 6,000, 8,000). The size of the validation set was  
138 adapted based on the size of the training data (20, 50, 100, 200, 300, 400, 500, 750, 1,000), as with smaller  
139 data panels an higher impact of the validation set was observed. For the Arabidopsis data, the data used for  
140 model fitting was split into 80% used for model fitting and 20% used for validation. As the training data for  
141 most of the Arabidopsis traits was already extremely small, a second study was conducted in which a fixed  
142 number of 25 epochs was performed with no validation set and therefore larger training set.

143 All tests for the simulated data / Arabidopsis data were repeated 25 / 100 times respectively, with randomly  
144 sampled training and test sets.

## 3 RESULTS

### 145 **3.1 Comparison between model types**

146 In the following, we will report results for a representative model from each of the three ANN class:

- 147 1. MPL: 2 FCL with 64 nodes
- 148 2. CNN: CL with kernel size and stride 10 + 2 FCL with 64 nodes
- 149 3. LCNN: LCL with kernel size and stride 10 + 2 FCL with 64 nodes

150 Minor improvements were obtained by tweaking parameter settings for selected traits but overall tendencies  
151 of predictive ability across filter size and number of nodes as well as layers were stable. More details on  
152 differences will be provided for the LCNN at the end of the results section. For the LMs there was no  
153 clear best model for all traits. We will consider GBLUP as the baseline, but also report results for BayesA

154 (Meuwissen et al., 2001) and the EGBLUP model (Martini, 2017). As results for effect sizes drawn from  
155 gaussian, gamma and binomial distribution were very similar, we will only report results for the effect sizes  
156 drawn from a gaussian distribution.

### 157 **3.2 Simulated data**

158 In the following, we will first report results for the traits with a simulated heritability of 0.5. In the purely  
159 additive setting with just 10 underlying QTL the highest predictive ability was obtained with the LCNN  
160 (0.666), outperforming the other three baseline models by around 0.03-0.04 (Table 1, Figure 2 (A)). When  
161 increasing the number of QTL to 1,000, differences between LCNN (0.606) and the other three baseline  
162 models increased to around 0.06-0.09 (Table 1, Figure 2 (B)). The BayesA model led to similar predictive  
163 ability (0.660) as the LCNN for 10 QTL but was outperformed (0.538) in case of 1,000 underlying QTL.  
164 Even though the simulated traits had a purely additive genetic background, the EGBLUP model led to very  
165 similar or even slightly higher predictive ability as the GBLUP model. A potential reason for this could be  
166 "phantome epistatis" (de los Campos et al., 2019) as the use of pair-wise marker interactions could lead to  
167 a better overall representation of haplotype similarities.

168 When considering a purely epistatic trait architecture with 10 underlying QTL, differences between the  
169 LCNN and the other three baseline models are also around 0.06-0.08 (Figure 3 (A)), whereas results  
170 in the case of 1,000 underlying QTL were very similar for all four baseline models (Table 1, Figure 3  
171 (B)) with the GBLUP model (0.416) leading to slightly higher predictive ability (0.01-0.02). In case the  
172 underlying QTL of the epistatic trait were played on physically linked markers to imitate a trait caused by  
173 local interactions in a gene, both the LCNN and CNN obtained higher predictive ability when only 10 QTL  
174 were involved in the trait, whereas the MLP and GBLUP performed worse (Figure 4 (A)). The relative  
175 differences between LCNN (0.625) and GBLUP (0.488) were here highest among all considered cases. In  
176 the case of 1000 locally linked underlying QTL, results of the four baseline models were again very similar  
177 with GBLUP performing about 0.01 better than the ANNs (Figure 4 (B)). In all cases of epistatic QTL, the  
178 use of the EGBLUP model led to higher predictive abilities than GBLUP. For both cases of 10 underlying  
179 epistatic QTL the LCNN model was still superior, whereas the EGBLUP model was best for traits with  
180 1,000 underlying epistatic QTL.

181 When considering traits with varying heritability, higher overall predictive ability for traits with higher  
182 heritability was observed. This was even the case after standardizing the predictive ability by dividing  
183 with the squared root of the heritability as this is the highest achievable correlation between phenotypes  
184 and estimated breeding values (Figure 5). Overall obtained standardized predictive ability for the additive  
185 traits are higher and close to the maximum in the case of 10 additive underlying QTL (Figure 5 (A)). In  
186 particular for cases of high heritability, the LCNN is outperforming all other models for both the additive  
187 trait with 1,000 QTL and the epistatic traits with 10 QTL (Figure 5 (B,C,E)). For the epistatic traits with  
188 1,000 QTL all models are on a similar level for all considered heritabilities (Figure 5 (D,F)).

189 When comparing the predictive ability depending on the number of individuals used for training, we  
190 observed worse performance of all three classes of ANN models relative to GBLUP for small training  
191 sets. In particular training sets of size 100 and 250 led to massive drops in predictive ability. Of the  
192 three ANN classes considered, the LCNN performed best and with the exception of the epistatic traits  
193 with 1,000 underlying QTL was at least close to the performance of GBLUP. In particular for traits with  
194 1,000 purely additive QTL and 10 epistatic QTL the increase in predictive ability was substantially higher  
195 than in all three considered linear models (Figure 6). As ANNs are known to be extremely data hungry  
196 (Goodfellow et al., 2016) this should not be that surprising. Overall, the ANN architectures with less layers  
197 and parameters were less affected by the reduced size of the training set.

198

### 199 3.3 Comparison between LCNN models

200 When comparing different layer designs for the LCNN, we observed small, but still significant differences  
201 between the different model architectures. In particular for purely additive traits, larger window sizes  
202 (WS) in the LCL led to higher accuracies (WS 5: 0.603; WS 10: 0.606; WS 20: 0.616), whereas the stride  
203 had neglectable impact (Figure 7). In regard to the design of the following FCLs, we observed increased  
204 predictive abilities when using a high number nodes (128 / 256) per layer (Figure 8). Differences between  
205 the highest obtain predictive ability for the different number of layers were neglectable, as long as at least  
206 one FCL was used.

### 207 3.4 Arabidopsis data

208 When comparing the different ANN models for the Arabidopsis dataset, the highest average predictive  
209 ability was observed for the LCNN model (0.340) compared to 0.316 for the MLP and 0.312 for the  
210 CNN (Table 2). All three ANNs were however outperformed by the three linear models (GBLUP, BayesA,  
211 EGBLUP). The differences between the ANNs and the linear models is decreasing for traits with higher  
212 number of individuals used in the training set. Whereas differences for traits with less than 100 individuals  
213 on average were 0.078 between GBLUP and the LCNN, this differences is reduced to 0.037 / 0.021 for  
214 traits with more than 100 / 250 lines in the training set (Table 2). The variance in obtained predictive  
215 ability was highest for MLP (0.031) and CNN (0.031) compared to the LCNN (0.029) and lowest for the  
216 linear models (0.024). Note that no traits with more than 468 phenotyped lines were considered here and  
217 gains in the simulated data were typically only obtained for training set with at least 1,000 lines (Figure  
218 6). When not using a validation set the overall accuracies are going up for all three considered ANN  
219 architectures and performances are more similar to GBLUP (Table 3, Figure 9). One exception to this is  
220 the trait FT\_field which resulted in extremely unstable models for all three ANNs with 20% of all trained  
221 models leading to basically zero predictive ability and on average 55% lower predictive ability. Details on  
222 the predictive ability of the individual traits and the number of phenotypes considered for each trait are  
223 given in Supplementary S4. Additional minor improvement were obtained by modifying the layer design  
224 for the FCLs after the LCNN. The interested reader is referred to Freudenthal (2020) for details on those  
225 extended benchmarking tests. Note that after trait-specific model architecture tunings in Freudenthal (2020)  
226 higher predictive ability with the LCNN compared to GBLUP were obtained for 33 of the 52 traits with  
227  $h^2 > 0.5$  were obtained, whereas only 27 of the 93 traits with  $h^2 < 0.5$  benefited from the use of an LCNN  
228 compared to GBLUP.

## 229 4 DISCUSSION

230 A common misconception of ANNs is that they are handled and used as black-boxes, leading to back  
231 propagation of causal variants and fundamental model design questions to be second order problems.  
232 Note that the baseline MLP models used in our tests results in a model with 2.2 million parameters and  
233 8,000 individuals and thereby leading to potential massive problems of overparametrization (Fan et al.,  
234 2014). The use of a CL is reducing this problems substantially with our baseline CNN "only" needing  
235 225,610 parameters. However, CLs assign effects to specific sequences of input variants. As the same  
236 sequence of markers on an array in different segments of the genome is usually not linked in any way, this  
237 modelling approach does not really make sense from a genetics perspective and thus makes it potentially  
238 more difficult to obtain a good model fit. The LCNN fixes these issues by introducing region-specific filters.  
239 This increases the number of required parameters in the model slightly (260,195), but still is a massive  
240 improvement in terms of number of parameters compared to the MLP. When working with whole genome  
241 sequence the use of CNNs has shown to be quite useful (Washburn et al., 2019). However, whole-genome  
242 sequence data does not reflect the currently available standard for genomic prediction, as no significant

242 gains in most applications are reported when using more than just low to medium density SNP arrays (Ober  
243 et al., 2012; Erbe et al., 2013), generating such sequence data is still costly (Schwarze et al., 2018) and  
244 problems of even higher overparametrization can arise here.

245 As shown by the results above, the use of a LCNN can massively improve the accuracy of genomic  
246 prediction compared to frequently applied ANNs architectures like MLPs and CNNs for both simulated  
247 and real datasets and in particular for traits with small training sets. In the case of the simulated data,  
248 improvements compared to linear models like GBLUP were obtained for both simulated purely additive  
249 and purely epistatic traits. However, for the real Arabidopsis data panel with at most a couple of hundred  
250 lines per phenotype, average predictive ability was slightly reduced as in particular for traits with small  
251 training sets, predictive abilities was substantially lower for the ANNs when a validation set was used.  
252 However when using a set number of training epoch and no validation set were almost on the level of  
253 GBLUP. Note however that the use of no validation set, requires prior knowledge on a reasonable number  
254 of training epochs and model architecture, therefore leading to potential model instability. The use of a  
255 LCNN was an improvement compared to more commonly applied ANN architectures (MLPs/CNNs) in  
256 both cases. The variance in predictive ability for the ANN models was slightly higher than for the linear  
257 models, but the differences were not large enough to cause major concerns in regard to model stability of  
258 the ANNs.

259 Whereas significantly higher numbers of genotyped lines in the setting of plant breeding are not realistic,  
260 even larger populations with potentially millions of animals are available in livestock breeding. As in  
261 particular for traits of medium complexity (1,000 additive QTL & 10 epistatic QTL) substantially gains  
262 for the LCNN compared to all other models were obtained, these results indicate high potential for  
263 genomic prediction in such traits as traditional linear models tend to reach a plateau in predictive ability  
264 (Erbe et al., 2013). However, a potential problem for the use in animal breeding is that for all considered  
265 individuals the same inputs have to be provided and therefore requiring the genotyping of all individuals.  
266 Particularly to be mentioned here is that there is no direct equivalent to single step GBLUP (Legarra et al.,  
267 2009; Christensen and Lund, 2010) to combine pedigree and genotype data in a joint relationship matrix up  
268 till now. Furthermore, one needs to consider that breeding values are additive by design and even if higher  
269 predictive ability is obtained with non-additive models, this will not necessarily result in higher genetic  
270 gains under a random mating environment (Martini et al., 2017). This leads us to conclude that ANNs (and  
271 in fact epistatic models like EGBLUP in general) are much better suited for the prediction of phenotypes  
272 than breeding values (Martini et al., 2017).

273 A further potential application for the use of ANNs that is in particular relevant for plant breeding is the  
274 inclusion of other omics, environmental data or even information about weather conditions, as ANNs  
275 are very flexible in their design and it is relatively easy to add additional input and/or output layers to an  
276 existing model. Computing times and model complexity in the framework of ANNs are far less affected by  
277 such additional inputs than GBLUP-based models (Gillberg et al., 2019). As such ANNs typically contain  
278 separate layers for each input dimension and those are concatenated in later steps, the use of an LCL for the  
279 SNP-based inputs should be highly beneficial for such applications.

280 When deciding between the use of ANNs and traditional linear models there are however more things to  
281 consider than just the plain predictive abilities. This particularly includes potential economic issues, as  
282 the use of ANNs would at this moment require genotyping of all individuals, and required conceptual  
283 changes to modern breeding programs as terms like reliability do not have a direct equivalent in ANNs  
284 and therefore among others require changes in the design of selection indices (Hazel and Lush, 1942;  
285 Miesenberger, 1997). Additional work in checking if higher predictive ability also translate into higher  
286 genomic gains is a further topic that needs to be investigated, as even the use of epistatic models have

287 shown to not always lead to higher gain, despite higher predictive ability (Martini et al., 2017).  
288 Nonetheless, we can conclude that there is considerable potential in the use of ANNs and in particular  
289 LCNN in genomic prediction when working with large individual numbers and high heritability. and/or  
290 additional input dimensions like other omics. We would expect the highest potential of ANNs to be  
291 especially relevant with more complex input and output layers, as present when considering different omics  
292 (Li et al., 2019), weather data (Gillberg et al., 2019) or prediction across environments (Freudenthal, 2020)  
293 as inputs, or multiple correlated traits as outputs (Lyra et al., 2017). Accounting for such input/outputs  
294 in the traditional models, even in a linear way, was shown to be extremely costly from a computational  
295 side and oftentimes does not significantly improve results (Calus and Veerkamp, 2011). With generation of  
296 such datasets becoming cheaper and widely available, we would expect the use of DL techniques to be of  
297 increasing importances for quantitative genetics and in particular genomic prediction in the near future.

## CONFLICT OF INTEREST STATEMENT

298 The authors declare that the research was conducted in the absence of any commercial or financial  
299 relationships that could be construed as a potential conflict of interest.

## AUTHOR CONTRIBUTIONS

300 TP lead the development of the methodology, performed the analysis and wrote the initial manuscript.  
301 JF, AK, HS provided critical feedback to both analysis and the manuscript. HS supervised the study. All  
302 authors read and approach the final manuscript.

## FUNDING

303 This study was funded by the German Federal Ministry of Education and Research (BMBF) via the project  
304 MAZE (“Accessing the genomic and functional diversity of maize to improve quantitative traits” – Funding  
305 ID: 031B0195).

## ACKNOWLEDGMENTS

306 We acknowledge support by the Open Access Publication Funds of the Göttingen University. The authors  
307 further thank the German Federal Ministry of Education and Research (BMBF) for the funding of our  
308 project (MAZE – “Accessing the genomic and functional diversity of maize to improve quantitative traits”;  
309 Funding ID: 031B0195).

## DATA AVAILABILITY STATEMENT

310 Publicly available datasets were analyzed in this study. This data can be found here:  
311 <https://arapheno.1001genomes.org/>  
312 <https://link.springer.com/article/10.1007/s00122-019-03428-8>.

## REFERENCES

- 313 Abadi, M., Agarwal, A., Barham, P., Brevdo, E., Chen, Z., Citro, C., et al. (2016). Tensorflow: Large-scale  
314 machine learning on heterogeneous distributed systems. *arXiv preprint arXiv:1603.04467*  
315 Albrecht, T., Wimmer, V., Auinger, H.-J., Erbe, M., Knaak, C., Ouzunova, M., et al. (2011). Genome-based  
316 prediction of testcross values in maize. *Theoretical and Applied Genetics* 123, 339  
317 Alonso-Blanco, C., Andrade, J., Becker, C., Bemm, F., Bergelson, J., Borgwardt, K. M., et al. (2016).  
318 1,135 genomes reveal the global pattern of polymorphism in arabidopsis thaliana. *Cell* 166, 481–491



- 319 Atwell, S., Huang, Y. S., Vilhjálmsson, B. J., Willems, G., Horton, M., Li, Y., et al. (2010). Genome-wide  
320 association study of 107 phenotypes in arabidopsis thaliana inbred lines. *Nature* 465, 627–631
- 321 Azodi, C. B., McCarren, A., Roantree, M., de Los Campos, G., and Shiu, S.-H. (2019). Benchmarking  
322 algorithms for genomic prediction of complex traits. *bioRxiv* , 614479
- 323 Bellot, P., de Los Campos, G., and Pérez-Enciso, M. (2018). Can deep learning improve genomic prediction  
324 of complex human traits? *Genetics* 210, 809–819
- 325 Calus, M. P. L. and Veerkamp, R. F. (2011). Accuracy of multi-trait genomic selection using different  
326 methods. *Genetics Selection Evolution* 43, 26
- 327 Chollet, F. (2015). Keras
- 328 Christensen, O. F. and Lund, M. S. (2010). Genomic prediction when some animals are not genotyped.  
329 *Genetics Selection Evolution* 42, 2
- 330 Da, Y., Wang, C., Wang, S., and Hu, G. (2014). Mixed model methods for genomic prediction and variance  
331 component estimation of additive and dominance effects using snp markers. *PLOS ONE* 9, e87666
- 332 de los Campos, G., Hickey, J. M., Pong-Wong, R., Daetwyler, H. D., and Calus, M. P. L. (2013).  
333 Whole-genome regression and prediction methods applied to plant and animal breeding. *Genetics* 193,  
334 327–345
- 335 de los Campos, G., Sorensen, D. A., and Toro, M. A. (2019). Imperfect linkage disequilibrium generates  
336 phantom epistasis (& perils of big data). *G3: Genes, Genomes, Genetics* 9, 1429–1436
- 337 Endelman, J. B. (2011). Ridge regression and other kernels for genomic selection with r package rrblup.  
338 *The Plant Genome* 4, 250–255
- 339 Eraslan, G., Avsec, Ž., Gagneur, J., and Theis, F. J. (2019). Deep learning: New computational modelling  
340 techniques for genomics. *Nature Reviews Genetics* , 1
- 341 Erbe, M., Gredler, B., Seefried, F. R., Bapst, B., and Simianer, H. (2013). A function accounting for  
342 training set size and marker density to model the average accuracy of genomic prediction. *PLOS ONE* 8,  
343 e81046
- 344 Erbe, M., Hayes, B. J., Matukumalli, L. K., Goswami, S., Bowman, P. J., Reich, C. M., et al. (2012).  
345 Improving accuracy of genomic predictions within and between dairy cattle breeds with imputed  
346 high-density single nucleotide polymorphism panels. *Journal of Dairy Science* 95, 4114–4129
- 347 Fan, J., Han, F., and Liu, H. (2014). Challenges of big data analysis. *National Science Review* 1, 293–314
- 348 Foley, J. A., Ramankutty, N., Brauman, K. A., Cassidy, E. S., Gerber, J. S., Johnston, M., et al. (2011).  
349 Solutions for a cultivated planet. *Nature* 478, 337
- 350 Freudenthal, J. A. (2020). Quantitative genetics from genome assemblies to neural network aided  
351 omics-based prediction of complex traits
- 352 Gianola, D., de los Campos, G., Hill, W. G., Manfredi, E., and Fernando, R. (2009). Additive genetic  
353 variability and the bayesian alphabet. *Genetics* 183, 347–363
- 354 Gianola, D. and Rosa, G. J. M. (2015). One hundred years of statistical developments in animal breeding.  
355 *Annu. Rev. Anim. Biosci.* 3, 19–56
- 356 Gillberg, J., Marttinen, P., Mamitsuka, H., and Kaski, S. (2019). Modelling  $g \times e$  with historical weather  
357 information improves genomic prediction in new environments. *Bioinformatics* 35, 4045–4052
- 358 Goodfellow, I., Bengio, Y., and Courville, A. (2016). *Deep learning* (MIT press)
- 359 Hayes, B. and Goddard, M. (2010). Genome-wide association and genomic selection in animal breeding.  
360 *Genome* 53, 876–883
- 361 Hayes, B. J., Bowman, P. J., Chamberlain, A. J., and Goddard, M. E. (2009). Invited review: Genomic  
362 selection in dairy cattle: Progress and challenges. *Journal of Dairy Science* 92, 433–443

- 363 Hazel, L. N. and Lush, J. L. (1942). The efficiency of three methods of selection. *Journal of Heredity* 33,  
364 393–399
- 365 Heslot, N., Jannink, J.-L., and Sorrells, M. E. (2015). Perspectives for genomic selection applications and  
366 research in plants. *Crop Science* 55, 1–12
- 367 Hölker, A. C., Mayer, M., Presterl, T., Bolduan, T., Bauer, E., Ordas, B., et al. (2019). European maize  
368 landraces made accessible for plant breeding and genome-based studies. *Theoretical and Applied*  
369 *Genetics*, 1–13
- 370 Jannink, J.-L., Lorenz, A. J., and Iwata, H. (2010). Genomic selection in plant breeding: From theory to  
371 practice. *Briefings in functional genomics* 9, 166–177
- 372 Jiang, Y. and Reif, J. C. (2015). Modeling epistasis in genomic selection. *Genetics* 201, 759–768
- 373 Khaki, S. and Wang, L. (2019). Crop yield prediction using deep neural networks. *Frontiers in plant*  
374 *science* 10
- 375 Kingma, D. P. and Ba, J. (2014). Adam: A method for stochastic optimization. *arXiv preprint*  
376 *arXiv:1412.6980*
- 377 Krizhevsky, A., Sutskever, I., and Hinton, G. E. (2012). Imagenet classification with deep convolutional  
378 neural networks. In *Advances in Neural Information Processing Systems 25*, eds. F. Pereira, C. J. C.  
379 Burges, L. Bottou, and K. Q. Weinberger (Curran Associates, Inc). 1097–1105
- 380 Legarra, A., Aguilar, I., and Misztal, I. (2009). A relationship matrix including full pedigree and genomic  
381 information. *Journal of Dairy Science* 92, 4656–4663
- 382 Li, Y., Huang, Y., Bergelson, J., Nordborg, M., and Borevitz, J. O. (2010). Association mapping of local  
383 climate-sensitive quantitative trait loci in arabidopsis thaliana. *Proceedings of the National Academy of*  
384 *Sciences* 107, 21199–21204
- 385 Li, Z., Simianer, H., and Martini, J. W. R. (2019). Integrating gene expression data into genomic prediction.  
386 *Frontiers in genetics* 10, 126
- 387 Lyra, D. H., de Freitas Mendonça, L., Galli, G., Alves, F. C., Granato, Í. S. C., and Fritsche-Neto, R.  
388 (2017). Multi-trait genomic prediction for nitrogen response indices in tropical maize hybrids. *Molecular*  
389 *breeding* 37, 80
- 390 Ma, W., Qiu, Z., Song, J., Li, J., Cheng, Q., Zhai, J., et al. (2018). A deep convolutional neural network  
391 approach for predicting phenotypes from genotypes. *Planta* 248, 1307–1318
- 392 Martini, J. W. R. (2017). *Incorporating Interactions and Gene Annotation Data in Genomic Prediction*.  
393 Ph.D. thesis, Georg-August-Universität Göttingen
- 394 Martini, J. W. R., Gao, N., Cardoso, D. F., Wimmer, V., Erbe, M., Cantet, R. J. C., et al. (2017). Genomic  
395 prediction with epistasis models: On the marker-coding-dependent performance of the extended gblup  
396 and properties of the categorical epistasis model (ce). *BMC Bioinformatics* 18, 3
- 397 Meijón, M., Satbhai, S. B., Tsuchimatsu, T., and Busch, W. (2014). Genome-wide association study using  
398 cellular traits identifies a new regulator of root development in arabidopsis. *Nature Genetics* 46, 77
- 399 Meuwissen, T. H. E., Hayes, B. J., and Goddard, M. E. (2001). Prediction of total genetic value using  
400 genome-wide dense marker maps. *Genetics* 157, 1819–1829
- 401 Miesenberger, J. (1997). *Zuchtzieldefinition und Indexselektion für die österreichische Rinderzucht* (na)
- 402 Montesinos-López, O. A., Martín-Vallejo, J., Crossa, J., Gianola, D., Hernández-Suárez, C. M., Montesinos-  
403 López, A., et al. (2019). New deep learning genomic-based prediction model for multiple traits with  
404 binary, ordinal, and continuous phenotypes. *G3: Genes, Genomes, Genetics* 9, 1545–1556
- 405 Nakaya, A. and Isobe, S. N. (2012). Will genomic selection be a practical method for plant breeding?  
406 *Annals of botany* 110, 1303–1316

- 407 Ober, U., Ayroles, J. F., Stone, E. A., Richards, S., Zhu, D., Gibbs, R. A., et al. (2012). Using whole-genome  
408 sequence data to predict quantitative trait phenotypes in *Drosophila melanogaster*. *PLOS Genetics* 8,  
409 e1002685
- 410 Pérez, P. and de los Campos, G. (2014). Genome-wide regression & prediction with the bglr statistical  
411 package. *Genetics* , 483–495
- 412 Pérez-Enciso, M. and Zingaretti, L. M. (2019). A guide for using deep learning for complex trait genomic  
413 prediction. *Genes* 10, 553
- 414 Pook, T., Schlather, M., and Simianer, H. (2020). Mobps - modular breeding program simulator. *G3:  
415 Genes, Genomes, Genetics* , g3.401193.2020doi:10.1534/g3.120.401193
- 416 Purcell, S., Neale, B., Todd-Brown, K., Thomas, L., Ferreira, M. A. R., Bender, D., et al. (2007). Plink: A  
417 tool set for whole-genome association and population-based linkage analyses. *The American Journal of  
418 Human Genetics* 81, 559–575
- 419 Schaeffer, L. R. (2006). Strategy for applying genome-wide selection in dairy cattle. *Journal of Animal  
420 Breeding and Genetics* 123, 218–223
- 421 Schwarze, K., Buchanan, J., Taylor, J. C., and Wordsworth, S. (2018). Are whole-exome and whole-genome  
422 sequencing approaches cost-effective? a systematic review of the literature. *Genetics in Medicine* 20,  
423 1122–1130
- 424 Seren, Ü., Grimm, D., Fitz, J., Weigel, D., Nordborg, M., Borgwardt, K., et al. (2016). Arapheno: A public  
425 database for *Arabidopsis thaliana* phenotypes. *Nucleic acids research* , gkw986
- 426 Strauch, R. C., Svedin, E., Dilkes, B., Chapple, C., and Li, X. (2015). Discovery of a novel amino acid  
427 racemase through exploration of natural variation in *Arabidopsis thaliana*. *Proceedings of the National  
428 Academy of Sciences* 112, 11726–11731
- 429 Ubbens, J. R. and Stavness, I. (2017). Deep plant phenomics: A deep learning platform for complex plant  
430 phenotyping tasks. *Frontiers in plant science* 8, 1190
- 431 Unterseer, S., Bauer, E., Haberer, G., Seidel, M., Knaak, C., Ouzunova, M., et al. (2014). A powerful tool  
432 for genome analysis in maize: development and evaluation of the high density 600 k snp genotyping  
433 array. *BMC Genomics* 15, 823
- 434 VanRaden, P. M. (2008). Efficient methods to compute genomic predictions. *Journal of Dairy Science* 91,  
435 4414–4423
- 436 Waldmann, P. (2018). Approximate bayesian neural networks in genomic prediction. *Genetics Selection  
437 Evolution* 50, 70
- 438 Washburn, J. D., Mejia-Guerra, M. K., Ramstein, G., Kremling, K. A., Valluru, R., Buckler, E. S., et al.  
439 (2019). Evolutionarily informed deep learning methods for predicting relative transcript abundance from  
440 dna sequence. *Proceedings of the National Academy of Sciences* 116, 5542–5549

**Table 1.** Predictive ability for the different models on different traits with  $h^2 = 0.5$ .

| Trait architecture                 | GBLUP | BayesA | EGBLUP | MPL   | CNN   | LCNN  |
|------------------------------------|-------|--------|--------|-------|-------|-------|
| 10 additive QTL                    | 0.639 | 0.660  | 0.635  | 0.637 | 0.627 | 0.666 |
| 1,000 additive QTL                 | 0.516 | 0.538  | 0.543  | 0.524 | 0.538 | 0.606 |
| 10 epistatic QTL                   | 0.511 | 0.527  | 0.519  | 0.503 | 0.491 | 0.572 |
| 1,000 epistatic QTL                | 0.416 | 0.414  | 0.448  | 0.395 | 0.403 | 0.401 |
| 10 locally linked epistatic QTL    | 0.488 | 0.501  | 0.529  | 0.504 | 0.544 | 0.625 |
| 1,000 locally linked epistatic QTL | 0.524 | 0.523  | 0.541  | 0.519 | 0.517 | 0.510 |

**Table 2.** Average predictive ability for the different models for the Arabidopsis traits in relation to the size of the training set.

| Trait architecture                                    | GBLUP | BayesA | EGBLUP | MPL   | CNN   | LCNN  |
|-------------------------------------------------------|-------|--------|--------|-------|-------|-------|
| Average predictive ability (all)                      | 0.390 | 0.382  | 0.382  | 0.316 | 0.312 | 0.340 |
| Average predictive ability (training set < 100)       | 0.404 | 0.390  | 0.399  | 0.300 | 0.299 | 0.326 |
| Average predictive ability (100 < training set < 250) | 0.364 | 0.358  | 0.354  | 0.318 | 0.311 | 0.327 |
| Average predictive ability (training set > 250)       | 0.477 | 0.477  | 0.472  | 0.358 | 0.370 | 0.456 |

**Table 3.** Average predictive ability for the different models for the Arabidopsis traits in relation to the size of the training set and no validation set.

| Trait architecture                                    | MPL   | CNN   | LCNN  |
|-------------------------------------------------------|-------|-------|-------|
| Average predictive ability (all)                      | 0.346 | 0.348 | 0.354 |
| Average predictive ability (training set < 100)       | 0.342 | 0.341 | 0.353 |
| Average predictive ability (100 < training set < 250) | 0.344 | 0.344 | 0.334 |
| Average predictive ability (training set > 250)       | 0.370 | 0.392 | 0.468 |

## FIGURE CAPTIONS

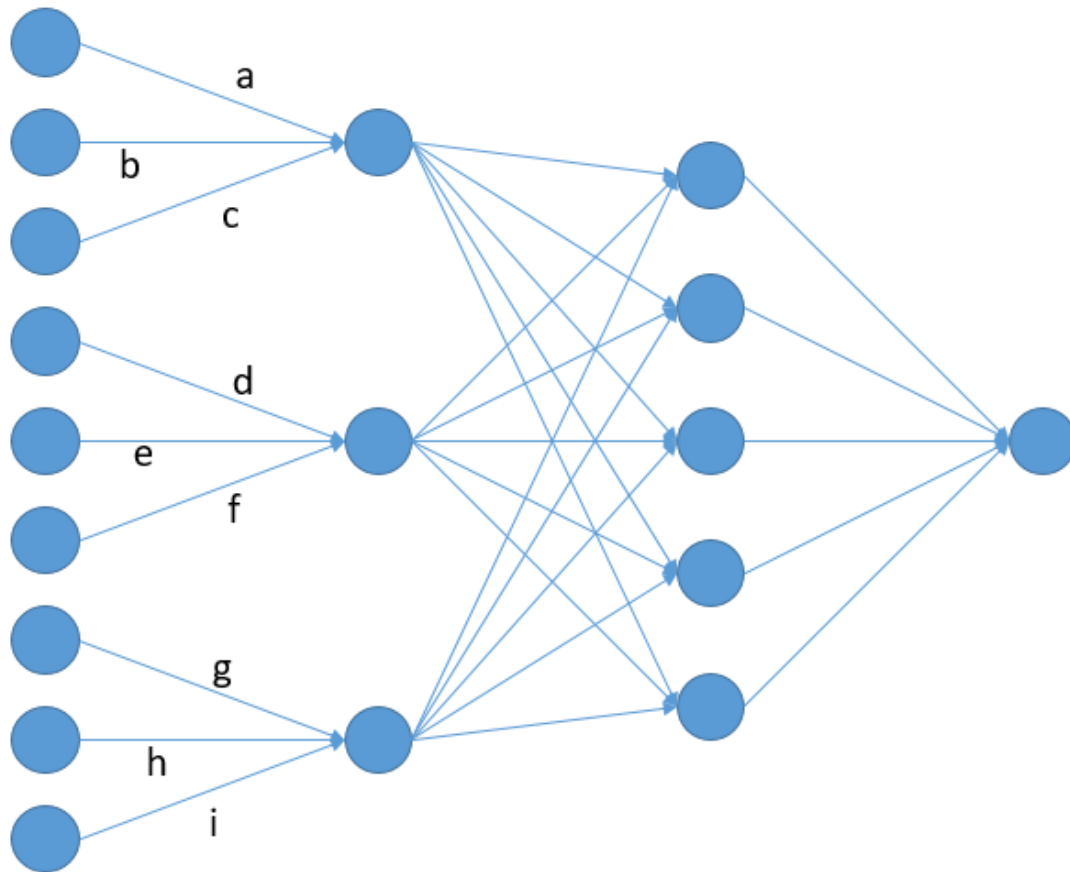

**Figure 1.** Node architecture of an LCNN containing a LCL with window size and stride of 3 and a FCL with 5 nodes.

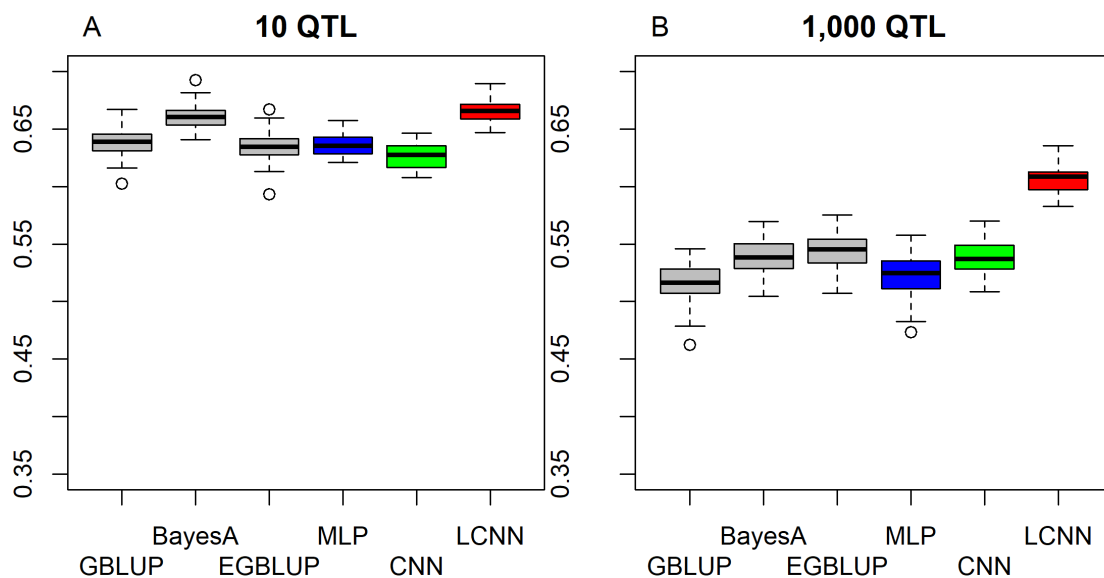

**Figure 2.** Predictive ability of different methods for genomic prediction for a simulated trait with 10 (A) and 1,000 (B) purely additive QTL.

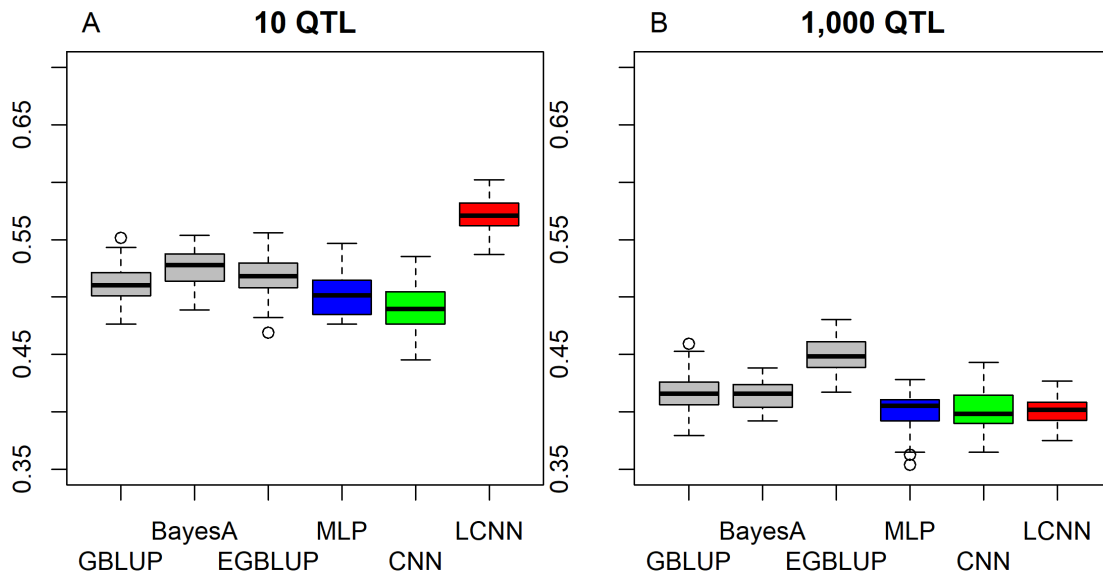

**Figure 3.** Predictive ability of different methods for genomic prediction for a simulated trait with 10 (A) and 1,000 (B) purely non-linked epistatic QTL.

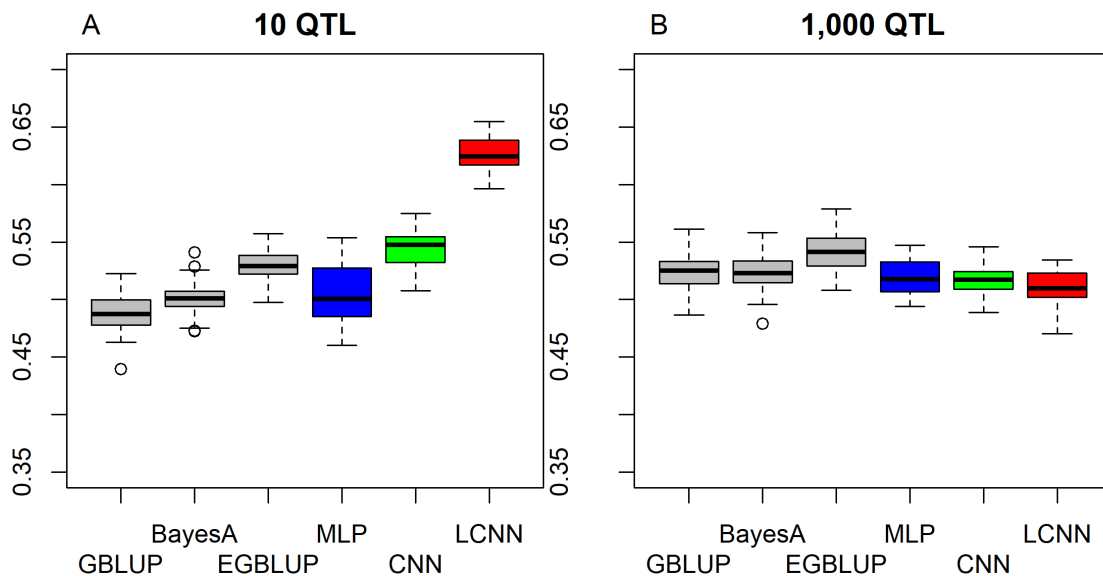

**Figure 4.** Predictive ability of different methods for genomic prediction for a simulated trait with 10 (A) and 1,000 (B) purely non-linked epistatic QTL.

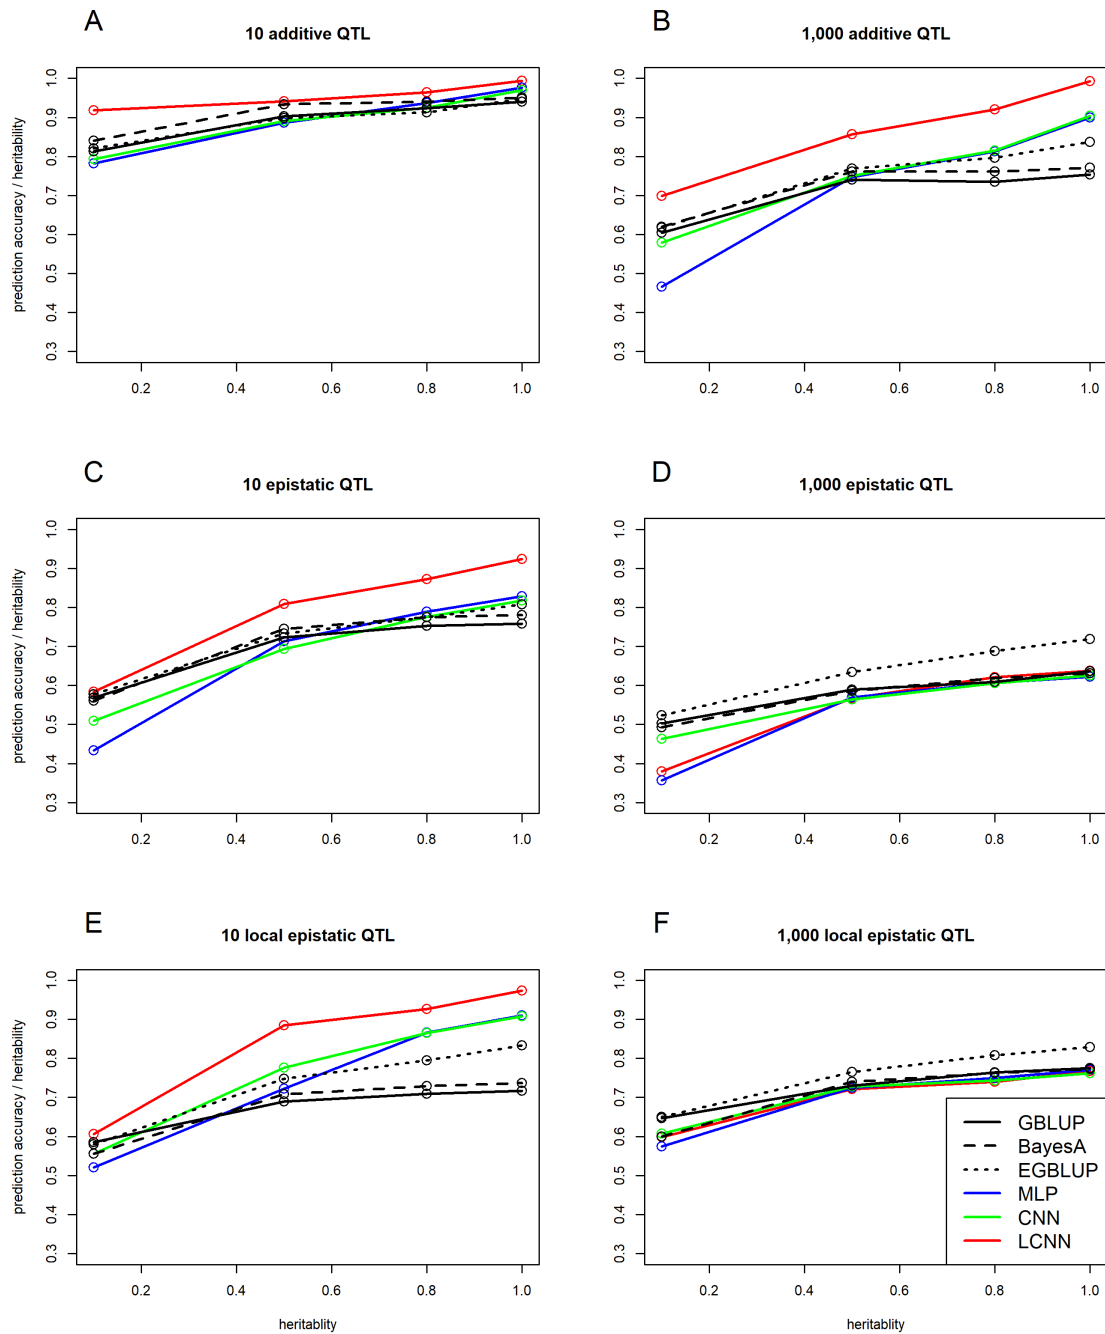

**Figure 5.** Predictive ability of the LCNN compared to the GBLUP model in relation to the trait heritability for the purely additive (A/B), epistatic (C/D) and physically linked epistatic (E/F) trait with 10/1,000 underlying QTL.

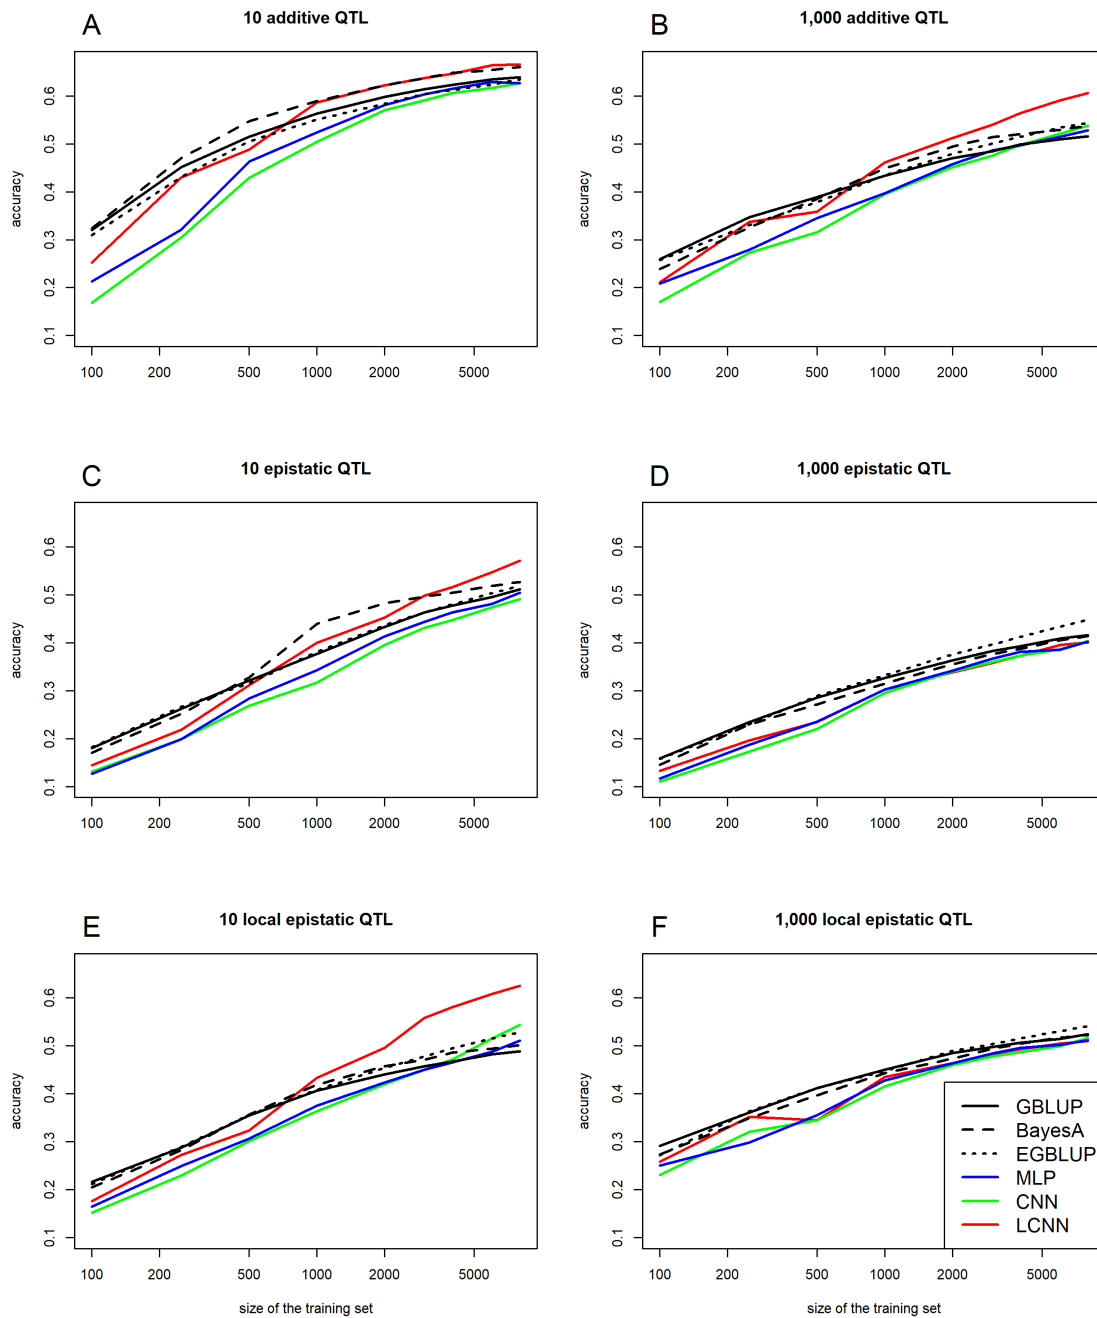

**Figure 6.** Predictive ability of the representative LCNN model and BayesA depending on the size of the training set for purely additive (A/B), epistatic (C/D) and physically linked epistatic (E/F) trait with 10/1,000 underlying QTL.



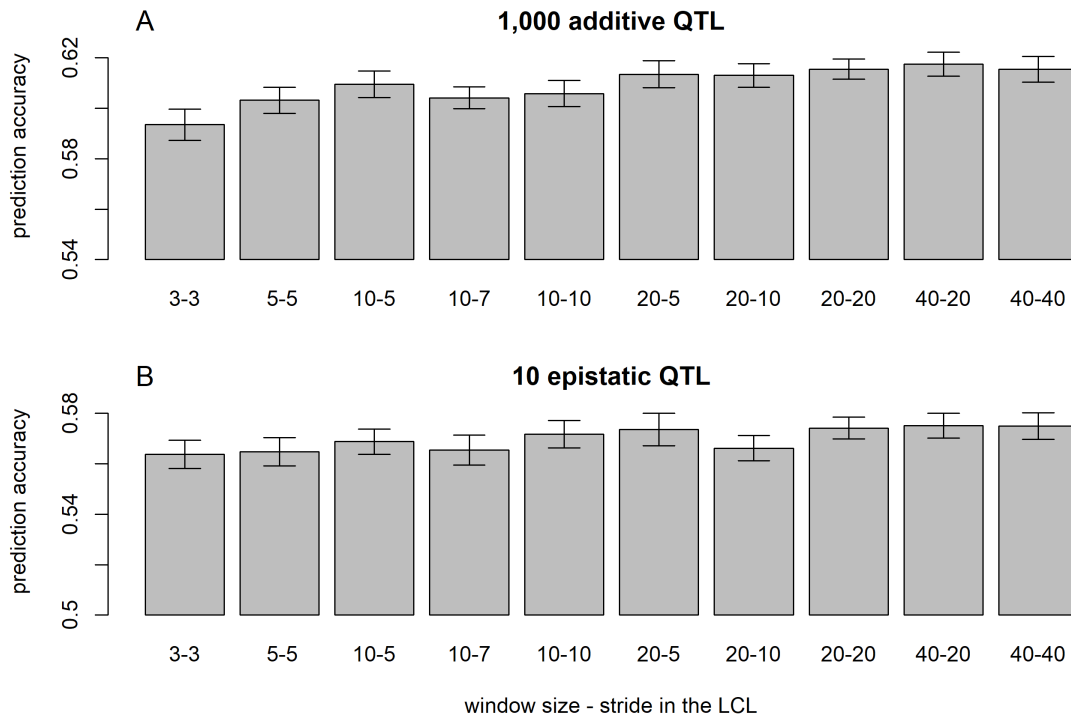

**Figure 7.** Predictive ability of different layer designs of the LCNN with modifications to the LCL for the purely additive trait with 1,000 QTL (A) and the epistatic trait with 10 QTL (B).

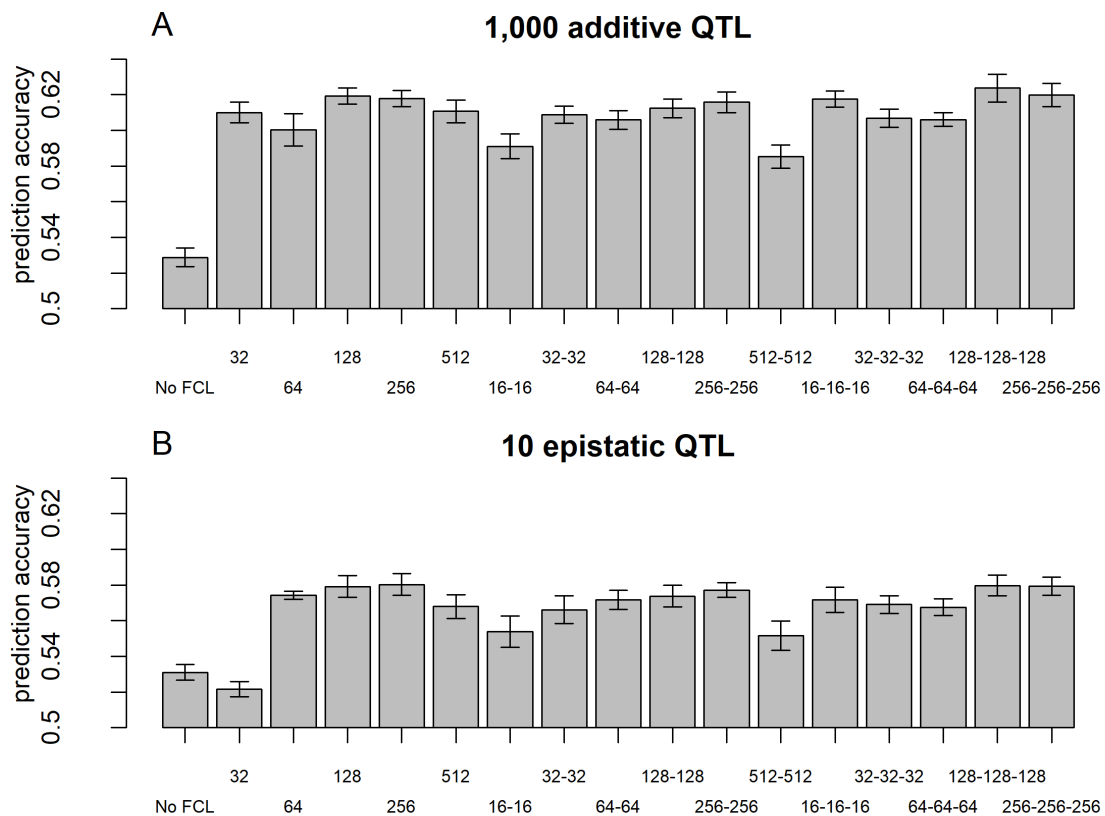

**Figure 8.** Predictive ability of different layer designs of the LCNN with modifications to the FCLs for the purely additive trait with 1,000 QTL (A) and the epistatic trait with 10 QTL (B).

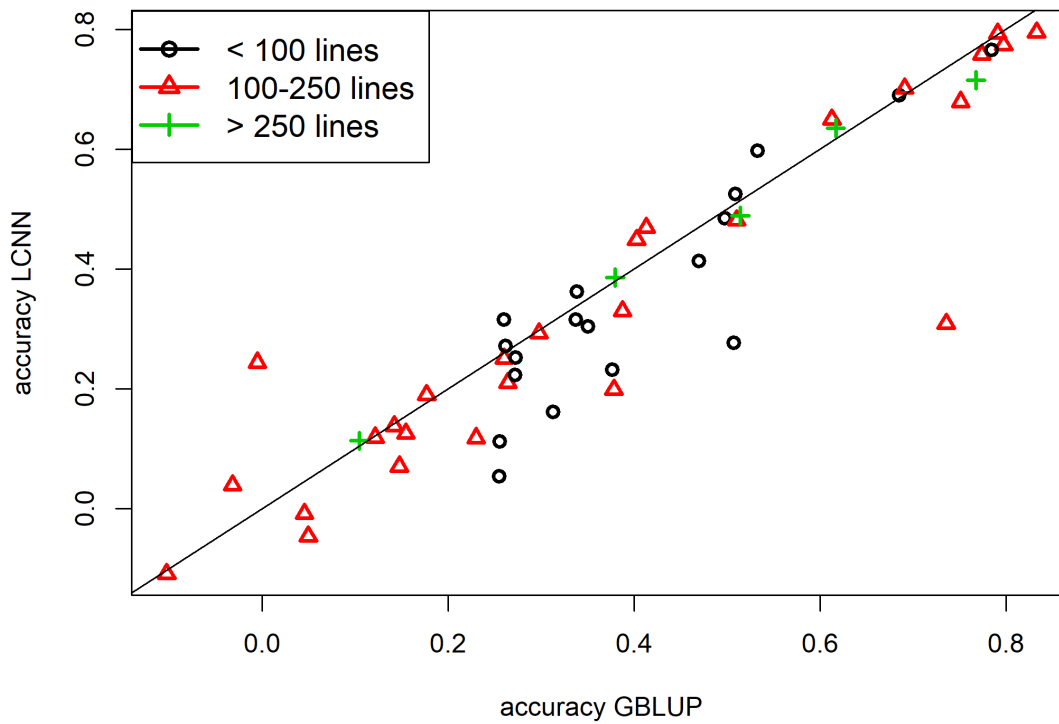

**Figure 9.** Predictive ability for GBLUP and the LCNN model for the different arabidopsis traits in relation to the size of the training set and no validation set.
